# Supplementary material
Source: Springer Nature journal article supplement (https://www.springermedizin.de/resource/supplementary/12913_2012_2713_MOESM1_ESM.pdf/9531236)

Men

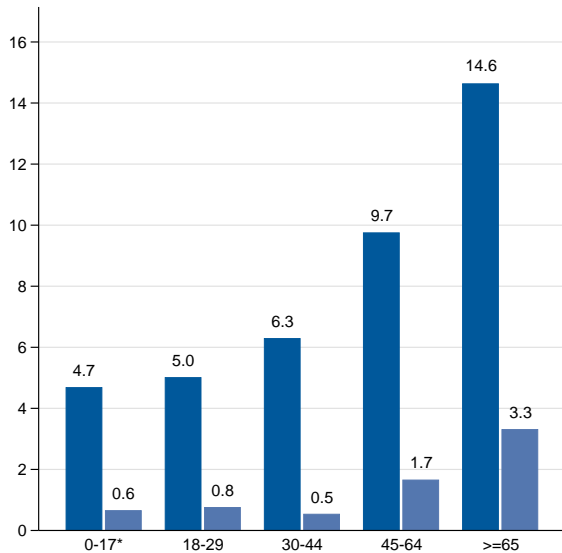

Women

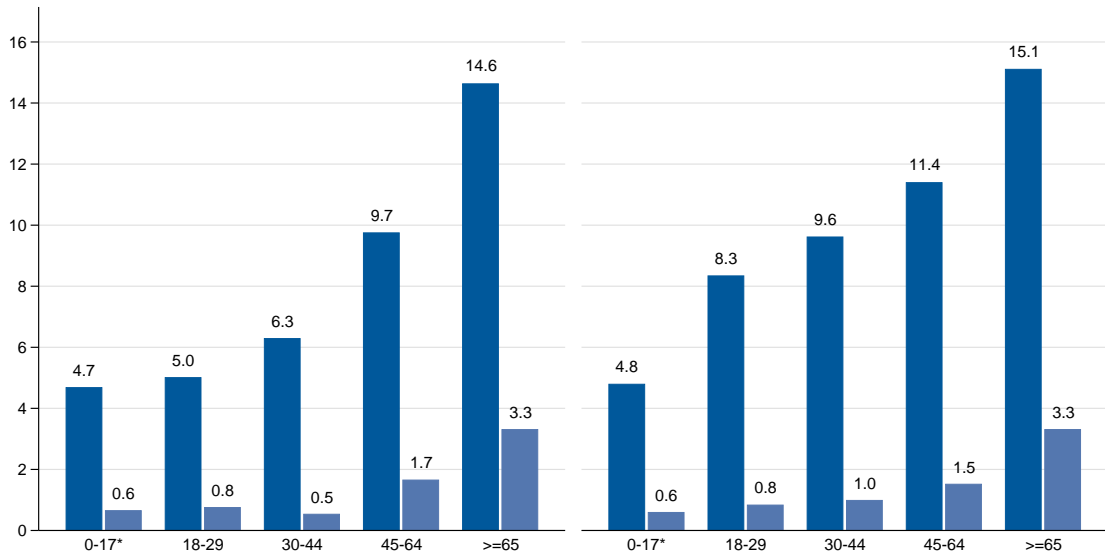

■ Doctor visits    ■ Hospital days

Supplement: MOESM1 [file 9531236]
